# Supplementary material
Source: publisher site journal article supplement (https://www.dovepress.com/article/242261)
Supplement: Supplementary file 1 [file get_supplementary_file.php]

**Supplemental table**

| No. | Specimen | DST from MGITSIRE | MIC from macrodilution | Isoniazid mutation | Rifampicin mutation | Fluoroquinolone mutation | Aminoglycoside mutation |
| --- | --- | --- | --- | --- | --- | --- | --- |
| 1 | Sputum | I,R,S | 16 | *kat*G deletion | *rpo*B deletion | no mutation | no mutation |
| 2 | Sputum | I | 4 | *inh*A C-15T | no mutation | no mutation | no mutation |
| 3 | Sputum | I | 4 | *kat*G S315T | no mutation | no mutation | no mutation |
| 4 | Sputum | I | 4 | *kat*G S315T | no mutation | no mutation | no mutation |
| 5 | Sputum | I | 4 | *kat*G S315T | no mutation | no mutation | no mutation |
| 6 | Sputum | I | 4 | *kat*G S315T | no mutation | no mutation | no mutation |
| 7 | Sputum | I | 4 | *kat*G S315T | no mutation | no mutation | no mutation |
| 8 | Sputum | I | 4 | *kat*G S315T | no mutation | no mutation | no mutation |
| 9 | Sputum | I,E | 4 | *kat*G S315T | no mutation | no mutation | no mutation |
| 10 | Sputum | I, R | 4 | *kat*G S315T | no mutation | no mutation | no mutation |
| 11 | Sputum | I,R,S | 4 | *kat*G S315T | *rpo*B D516V | no mutation | no mutation |
| 12 | Chest wall | I,R,S | 4 | *kat*G S315T | no mutation | no mutation | no mutation |
| 13 | Lymph node | I, S | 4 | *kat*G S315T | no mutation | no mutation | no mutation |
| 14 | Sputum | I | 2 | *kat*G S315T | no mutation | no mutation | no mutation |
| 15 | Sputum | I | 2 | *kat*G S315T | no mutation | no mutation | no mutation |
| 16 | Sputum | I | 2 | *kat*G S315T | no mutation | no mutation | no mutation |
| 17 | Axillary mass | I | 2 | *kat*G S315T | no mutation | no mutation | no mutation |
| 18 | Ileus tissue | I | 2 | *kat*G S315T | no mutation | no mutation | no mutation |
| 19 | Sputum | I | 2 | *kat*G S315T | no mutation | no mutation | no mutation |
| 20 | Sputum | I | 2 | *kat*G S315T | no mutation | no mutation | no mutation |
| 21 | Sputum | I | 2 | *kat*G S315T | no mutation | no mutation | no mutation |
| 22 | Sputum | I | 2 | *kat*G S315T | *rpo*B deletion | no mutation | no mutation |
| 23 | Lymph node | I | 2 | *kat*G S315T | no mutation | no mutation | no mutation |
| 24 | Sputum | I | 2 | *kat*G S315T | no mutation | no mutation | no mutation |
| 25 | Neck mass | I | 2 | *kat*G S315T | no mutation | no mutation | no mutation |
| 26 | Sputum | I | 2 | *kat*G S315T | no mutation | no mutation | no mutation |
| 27 | Sputum | I | 2 | *kat*G S315T | no mutation | no mutation | no mutation |
| 28 | Sputum | I | 2 | *kat*G S315T | no mutation | no mutation | no mutation |
| 29 | Lymph node | I | 2 | *kat*G S315T | *rpo*B deletion | no mutation | no mutation |
| 30 | Sputum | I | 2 | *kat*G S315T | no mutation | no mutation | no mutation |
| 31 | Sputum | I | 2 | *kat*G S315T | no mutation | no mutation | no mutation |
| 32 | Sputum | I | 2 | *kat*G S315T | no mutation | no mutation | no mutation |
| 33 | Sputum | I | 2 | *kat*G S315T | no mutation | no mutation | no mutation |
| 34 | Endotracheal aspirate | I | 2 | *kat*G S315T | no mutation | no mutation | no mutation |
| 35 | Right tibia | I | 2 | *kat*G S315T | no mutation | no mutation | no mutation |
| 36 | Lung biopsy | I | 2 | *kat*G S315T | no mutation | no mutation | no mutation |
| 37 | Sputum | I | 2 | *kat*G S315T | no mutation | no mutation | no mutation |
| 38 | Sputum | I, R | 2 | *kat*G S315T | *rpo*B S531L | no mutation | no mutation |
| 39 | Lymph node | I, R | 2 | *kat*G S315T | *rpo*B S531L | no mutation | no mutation |
| 40 | Sputum | I, R, S | 2 | *kat*G S315T | *rpo*B S531L | no mutation | no mutation |
| 41 | Sputum | I, S | 2 | *kat*G S315T | no mutation | no mutation | no mutation |
| 42 | Sputum | I, S | 2 | *kat*G S315T | no mutation | no mutation | no mutation |
| 43 | Sputum | I, S | 2 | *kat*G S315T | no mutation | no mutation | no mutation |
| 44 | BAL | I, S | 2 | *kat*G S315T | no mutation | no mutation | no mutation |
| 45 | Sputum | I, S | 2 | *kat*G S315T | no mutation | no mutation | no mutation |
| 46 | Sputum | I, E | 2 | *kat*G S315T | no mutation | no mutation | no mutation |
| 47 | Back mass | I, R | 2 | *kat*G S315T | *rpo*B S531L | no mutation | no mutation |
| 48 | Chest wall | I, S | 2 | *kat*G S315T | no mutation | no mutation | no mutation |
| 49 | BAL | I, S | 2 | *kat*G S315T | no mutation | no mutation | no mutation |
| 50 | Sputum | I, R, E | 1 | *kat*G deletion | *rpo*B S531L | no mutation | no mutation |
| 51 | Sputum | I | 1 | *kat*G S315T | no mutation | no mutation | no mutation |
| 52 | Sputum | I | 1 | *kat*G S315T | no mutation | no mutation | no mutation |
| 53 | Sputum | I | 1 | *kat*G S315T | no mutation | no mutation | no mutation |
| 54 | Sputum | I,R | 1 | *kat*G S315T | *rpo*B deletion | no mutation | no mutation |
| 55 | Sputum | I | 0.4 | *inh*A C-15T | no mutation | no mutation | no mutation |
| 56 | Sputum | I | 0.4 | *inh*A C-15T | no mutation | no mutation | no mutation |
| 57 | Sputum | I | 0.4 | *inh*A C-15T | no mutation | no mutation | no mutation |
| 58 | Sputum | I | 0.4 | *inh*A C-15T | no mutation | no mutation | no mutation |
| 59 | Sputum | I | 0.4 | *inh*A C-15T | no mutation | no mutation | no mutation |
| 60 | Ascites fluid | I | 0.4 | *inh*A C-15T | no mutation | no mutation | no mutation |
| 61 | Sputum | I, R | 0.4 | *inh*A C-15T | *rpo*B H526Y | no mutation | *rrs* A1401G |
| 62 | Sputum | I,R,S | 0.4 | *inh*A C-15T | *rpo*B S531L | no mutation | no mutation |
| 63 | BAL | I,S | 0.4 | *inh*A C-15T | no mutation | no mutation | no mutation |
| 64 | Sputum | I,S | 0.4 | *inh*A C-15T | no mutation | no mutation | no mutation |
| 65 | Lymph node | I,S | 0.4 | *inh*A C-15T | no mutation | no mutation | no mutation |
| 66 | Sputum | I,S | 0.4 | *inh*A C-15T | no mutation | no mutation | no mutation |
| 67 | Lymph node | I,S | 0.4 | *inh*A C-15T | no mutation | no mutation | no mutation |
| 68 | Lymph node | I,S | 0.4 | *inh*A C-15T | no mutation | no mutation | no mutation |
| 69 | Sputum | I,S | 0.4 | *inh*A C-15T | no mutation | no mutation | no mutation |
| 70 | Sputum | I | 0.4 | no mutation | no mutation | no mutation | no mutation |
| 71 | Sputum | I | 0.4 | no mutation | no mutation | no mutation | no mutation |
| 72 | Sputum | I | 0.4 | no mutation | no mutation | *gyr*A D94G | no mutation |
| 73 | Sputum | I, R | 0.4 | no mutation | no mutation | no mutation | no mutation |
| 74 | BAL | I,S | 0.4 | no mutation | no mutation | no mutation | no mutation |

**Abbreviations:** I, isoniazid; R, rifampicin; S, streptomycin; E, ethambutol;

DST, drug susceptibility testing; MGIT, mycobacteria growth indicator tube; MIC, minimal inhibitory concentration; BAL,bronchoalveolar lavage
